# Supplementary material for: Differential contributions of peripheral and central mechanisms to pain in a rodent model of osteoarthritis
Source: PubMed Central journal article supplement (PMC5940779; doi:10.1038/s41598-018-25581-8), 2018-05-08
Supplement: 41598_2018_25581_MOESM1_ESM.pdf [file 41598_2018_25581_MOESM1_ESM.pdf]

# Supplemental Information

## **Differential contributions of peripheral and central mechanisms to pain in a rodent model of osteoarthritis**

Adrian R. Haywood PhD, Gareth J. Hathway PhD and Victoria Chapman PhD

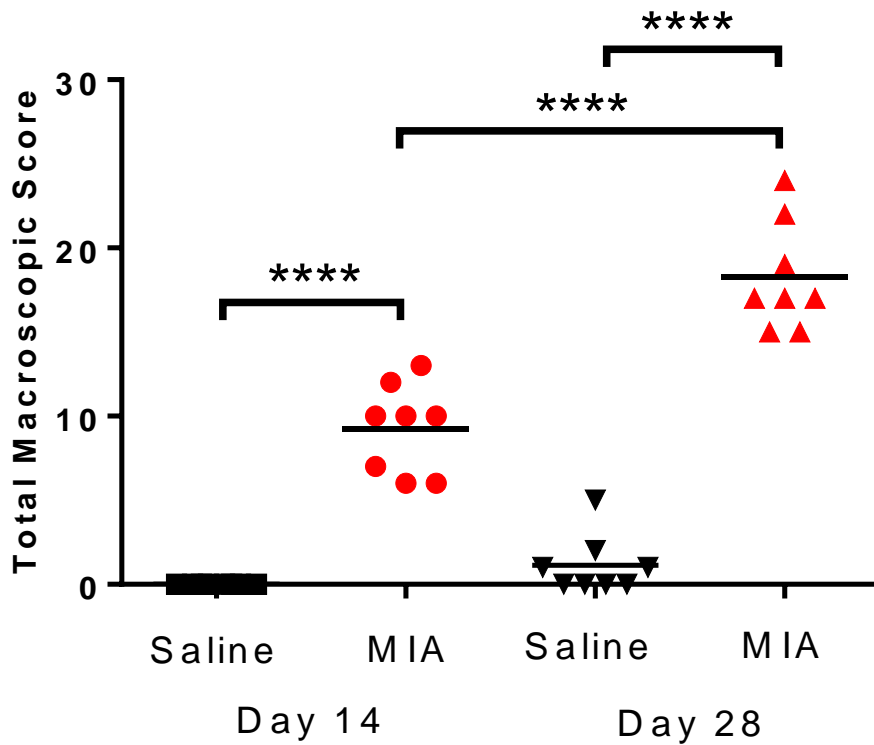

**Supplementary Figure 1:** Macroscopic scoring was performed on six knee compartments in MIA and saline-treated rats. At Day 14 post-MIA, there was a significant increase in macroscopic score compared to saline-treated rats. At Day 28 MIA treated rats also had a significantly increased score compared to saline controls and compared to Day 14 MIA rats. Treatments were compared with a one-way ANOVA with Sidak post-hoc test. N=8 rats per group \*\*\*\*= $p < 0.0001$ .

A

### Day-14: Injection sites

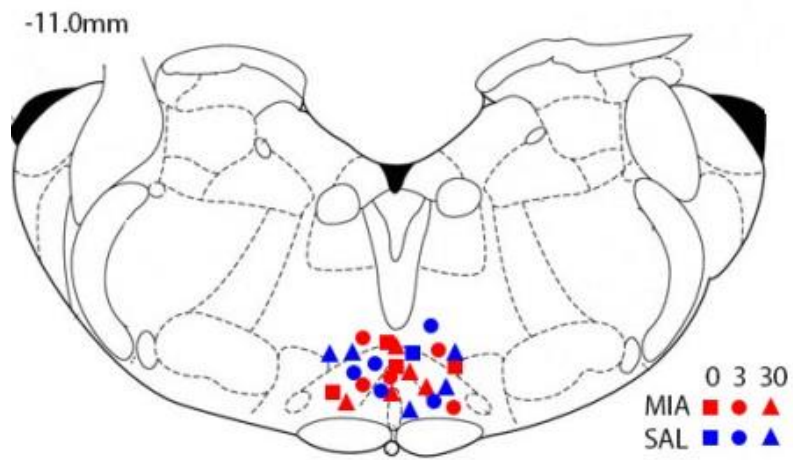

B

### Day-28: Injection sites

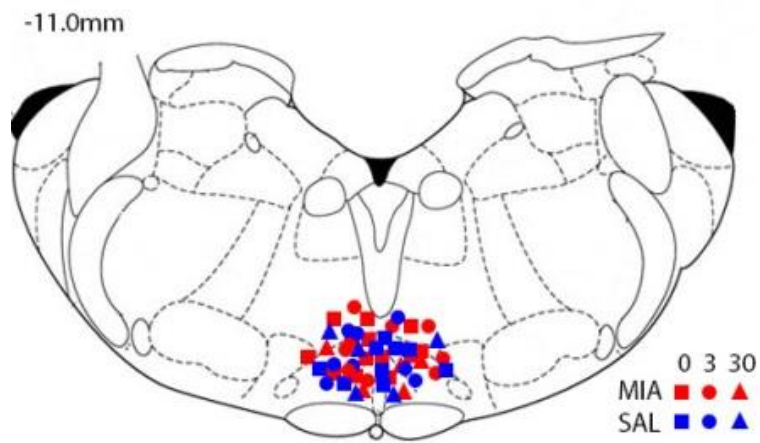

**Supplementary Figure 2:** Locations of intra-RVM microinjections at both Day 14 and Day 28 in MIA and saline treated rats.

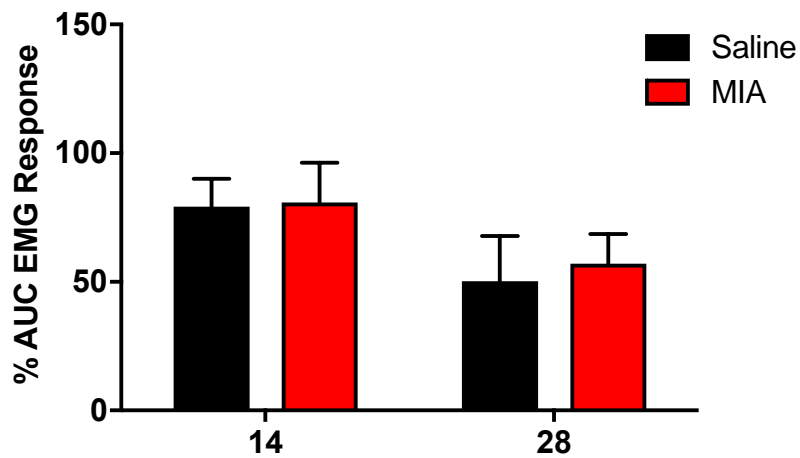

**Supplementary Figure 3:** Intra-RVM microinjections of lidocaine were unable to alter spinal reflex excitability at either Day14 or 28 post MIA.
